# Supplementary material
Source: Springer Nature journal article supplement (https://www.springermedizin.de/resource/supplementary/12887_2013_976_MOESM1_ESM.pdf/9476824)
Supplement: MOESM1 [file 9476824]

## Experimental design

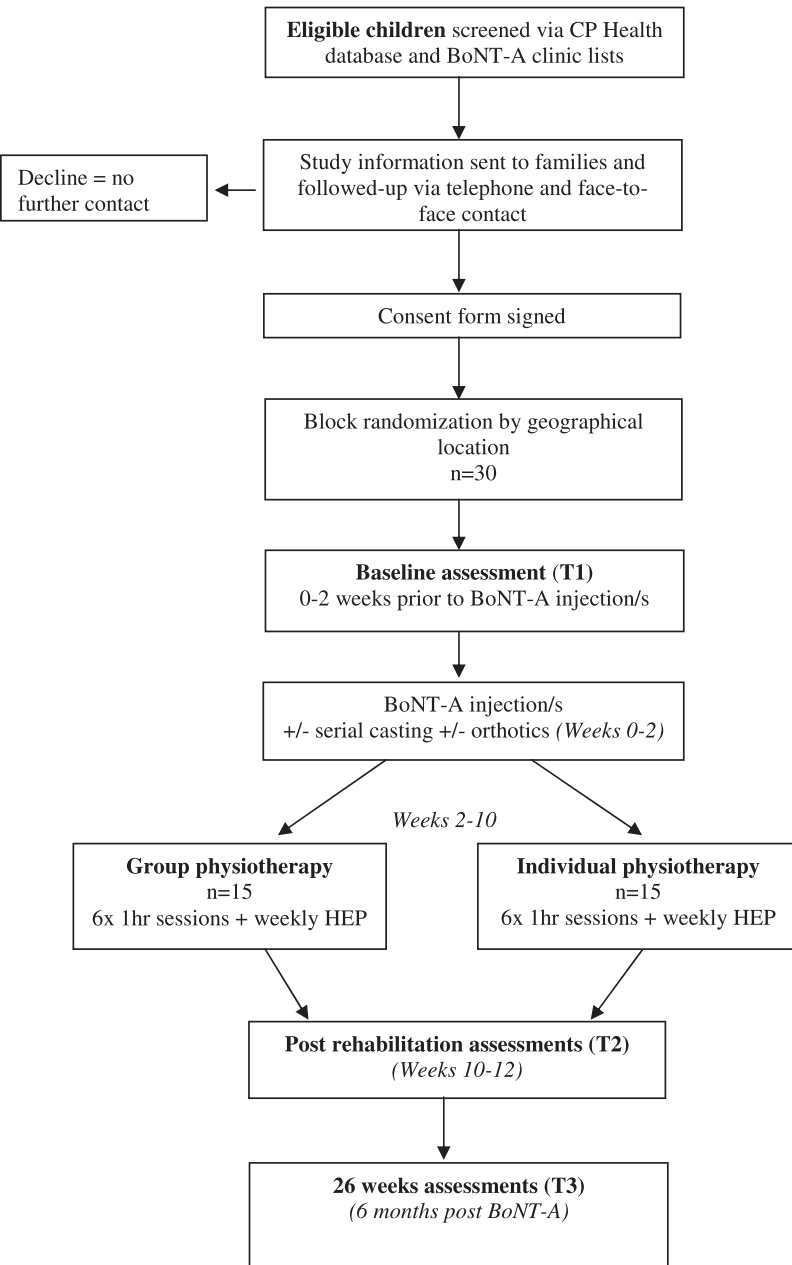

## Outcome measures for each assessment time-point

### Baseline outcome measures (T1)

#### Body structure and function:

- EVGS
- PRT

#### Activity/participation:

- COPM
- 1 MFWT
- GMFm-88 D&E

#### Contextual:

- CPQOL- Child (caregiver proxy version)

### Post BoNT-A outcome measures (T2)

#### Body structure and function:

- EVGS
- PRT

#### Activity/participation:

- COPM
- 1 MFWT
- GMFm-88 D&E

#### Contextual:

- CPQOL- Child (caregiver proxy version)
- Qualitative parent and child questionnaires
- Study coordinator (RT) to collect records from all treating PTs: session evaluation records x6; adverse events form; physiotherapist questionnaire.

### 26 weeks outcome measures (T3)

#### Body structure and function:

- EVGS
- PRT

#### Activity/participation:

- COPM
- 1 MFWT
- GMFm-88 D&E

#### Contextual:

- CPQOL- Child (caregiver proxy version)
- Qualitative 6 month activity questionnaire (parent report)
